# Supplementary material for: OCT4 and PAX6 determine the dual function of SOX2 in human ESCs as a key pluripotent or neural factor
Source: Stem Cell Res Ther. 2019 Apr 18;10:122. doi: 10.1186/s13287-019-1228-7 (PMC6471829; doi:10.1186/s13287-019-1228-7)
Supplement: Supplementary file 1 — Figure S1. Distinct dynamic expression of SOX2 and OCT4 during hESC differentiation. Related to the introduction and Fig. 4. Figure S2. Effects of SOX2 expression in hESCs. Related to Fig. 1 and Fig. 2. Figure S3. SOX2-OE hESCs cultured in KSR medium. Related to Fig. 3. Figure S4. OCT4 and PAX6 co-express transiently in early neural differentiation and bind to the same SOX2 HMG domain motif. Related to Fig. 4. Figure S5. Analysis of SOX2-OCT4 and SOX2-PAX6 ChIP-Seq datasets. Related to Fig. 5. Figure S6. OCT4 and BRN2 enhancers. Related to Fig. 6. Table S1. Primers used in the study. Related to Figs. 1, 2, 3 and 6 and Figures S1, S3-S4. Table S2. Antibodies used in the study. Related to Figs. 1, 2, 3, 4 and 6 and Figure S1-S2 and S4. (PDF 1426 kb) [file 13287_2019_1228_MOESM1_ESM.pdf]

## Supplemental Figure and Figure Legends

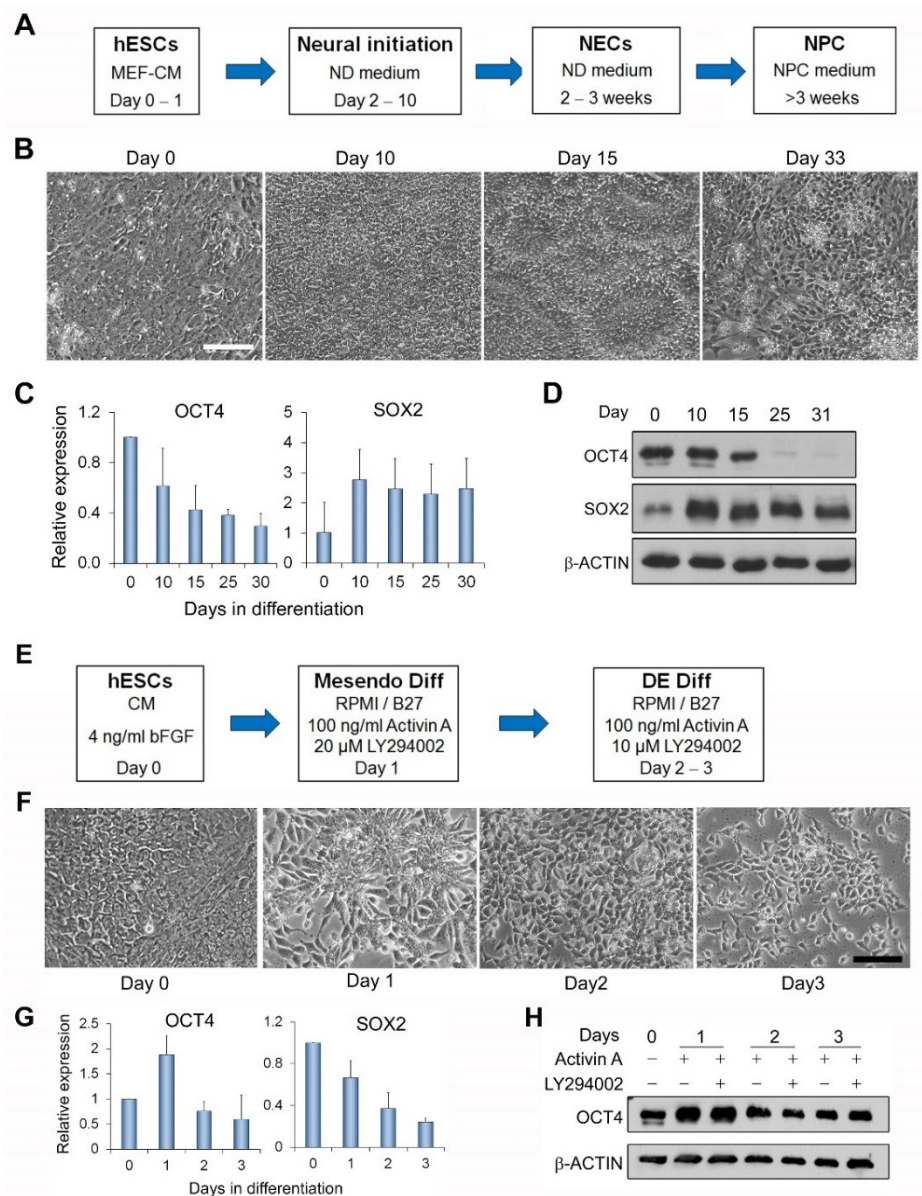

**Fig. S1. Distinct dynamic expression of SOX2 and OCT4 during hESC differentiation. Related to introduction and Fig. 4.** (A) Schematic diagram depicting hESC neural differentiation. MEF-CM, mouse embryonic fibroblast-conditioned medium; ND, neural differentiation; NEC: neural epithelial cell; NPC, neural progenitor cell. (B) Representative cell images during hESC neural differentiation. The days in differentiation are indicated. Scale bar = 100  $\mu$ m. (C) OCT4 and SOX2 mRNA levels during neural differentiation by qRT-PCR. Data are presented as fold changes relative to day 0 of the hESCs. Error bars represent mean  $\pm$  SD of 6-9 analysed samples from two independent differentiations. (D) Immunoblot showing OCT4 and SOX2 protein levels as in C. (E) Illustrative diagram depicting hESC DE differentiation. (F) Representative cell images during hESC DE differentiation. The days in differentiation are indicated. Scale bar = 100  $\mu$ m. (G) OCT4 and SOX2 mRNA levels during DE differentiation by qRT-PCR. Data presented as in C. (H) Immunoblotting showing OCT4 and SOX2 protein levels during DE differentiation of hESCs.

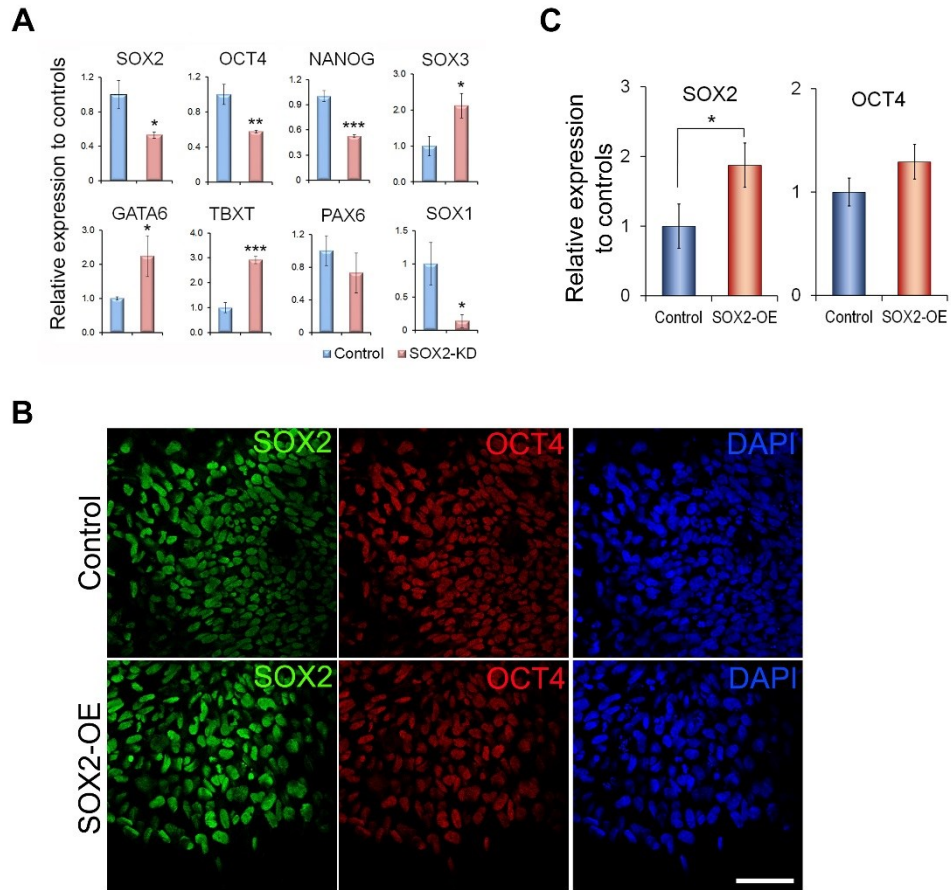

**Fig. S2. Effects of SOX2 expression in hESCs. Related to Fig. 1 and Fig. 2.** (A) The indicated mRNA expression in H7 hESCs 4 days after they were infected with lentivirus carrying SOX2 (SOX2-KD) or scrambled (Control) shRNAs as in Fig. 1C. (B) Immunostaining of control and SOX2-overexpressing (SOX2-OE) H1 hESCs with OCT4 and SOX2 antibodies. (C) SOX2 and OCT4 mRNA expression in FACS-sorted Tra-1-81+ SOX2-OE and control H1 hESCs. Data are presented as mean  $\pm$  SD from 3 independent SOX2-KD or SOX2-OE cell lines with triplicate PCR for each sample.

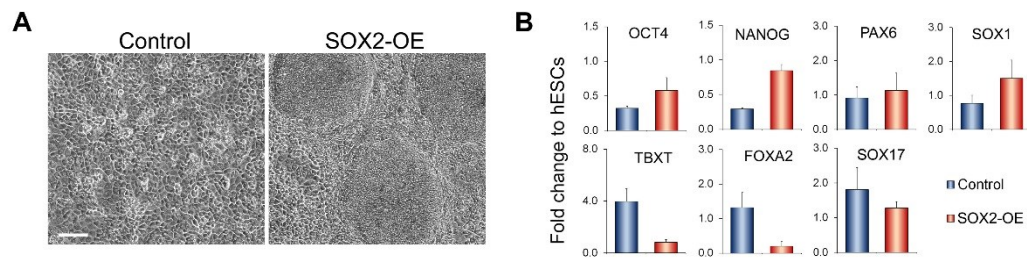

**Fig. S3. SOX2-OE hESCs cultured in KSR medium. Related to Fig. 3.** (A) Representative cell images of SOX2-OE and control cells in KSR medium for ~30 days. Scale bar = 100  $\mu$ m. (B) mRNA expression of indicated markers by qRT-PCR. Error bars represent mean  $\pm$  SD of 6-9 analysed samples from two independent differentiations.

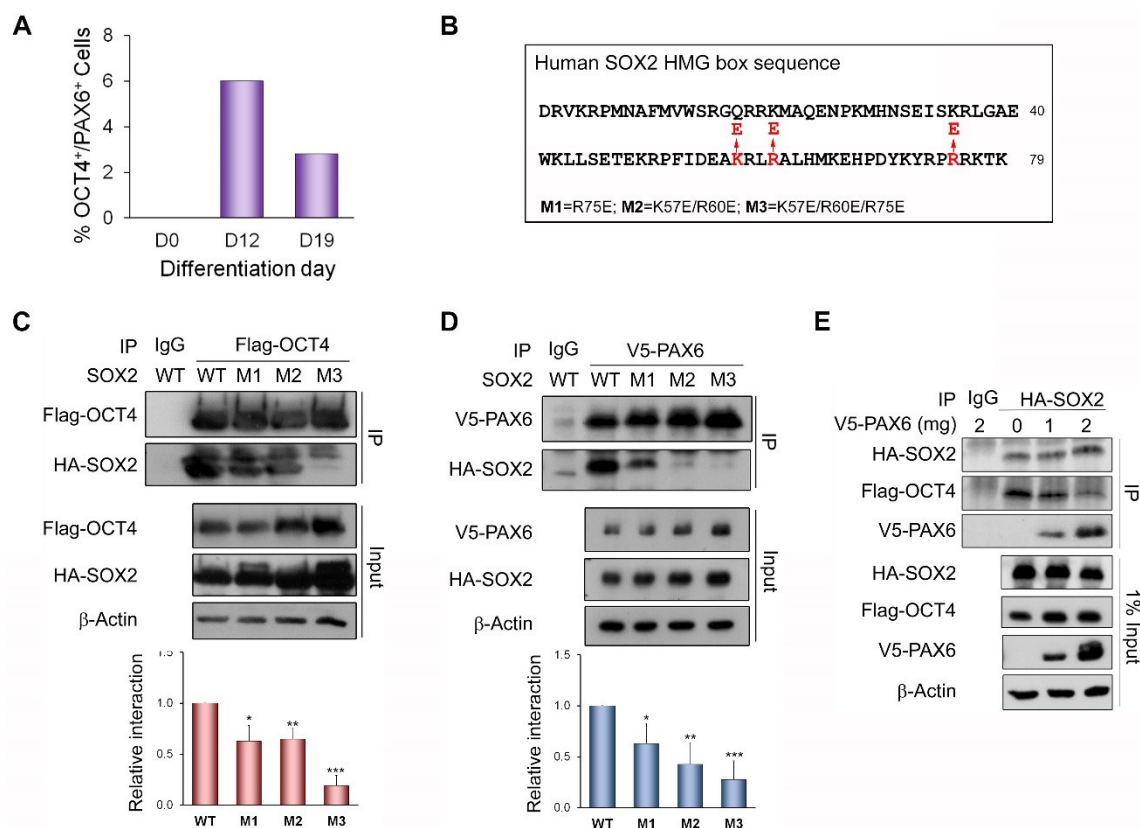

**Fig. S4. OCT4 and PAX6 co-express transiently in early neural differentiation and bind to the same SOX2 HMG domain motif. Related to Fig. 4.** (A) Percentage of cells expressing both PAX6 and OCT4 at the indicated days during neural differentiation analyzed by single cell RNA-seq (Yao et al., 2017). (B) Illustration of SOX2 HMG box sequence with the mutated residues indicated. (C) Co-IP showing Oct4 interactions with the indicated Sox2 mutants in (B) after co-transfection into HEK293T cells. \*, \*\*, \*\*\* represent  $p < 0.05$ ,  $0.01$ ,  $0.005$  by student  $t$  test relative to WT ( $n=3$ ). (D) Co-IP experiments performed similar to (C) showing Pax6 interactions with the same SOX2 mutants. (E) Co-transfection of HA-SOX2 and Flag-OCT4 into HEK293T cells with increasing dosages of V5-PAX6 as indicated. Then the cell lysates were isolated and immunoprecipitated with HA-SOX2 antibody, and the immunoprecipitates were immunoblotted with Flag-OCT4 and V5-PAX6 antibodies.

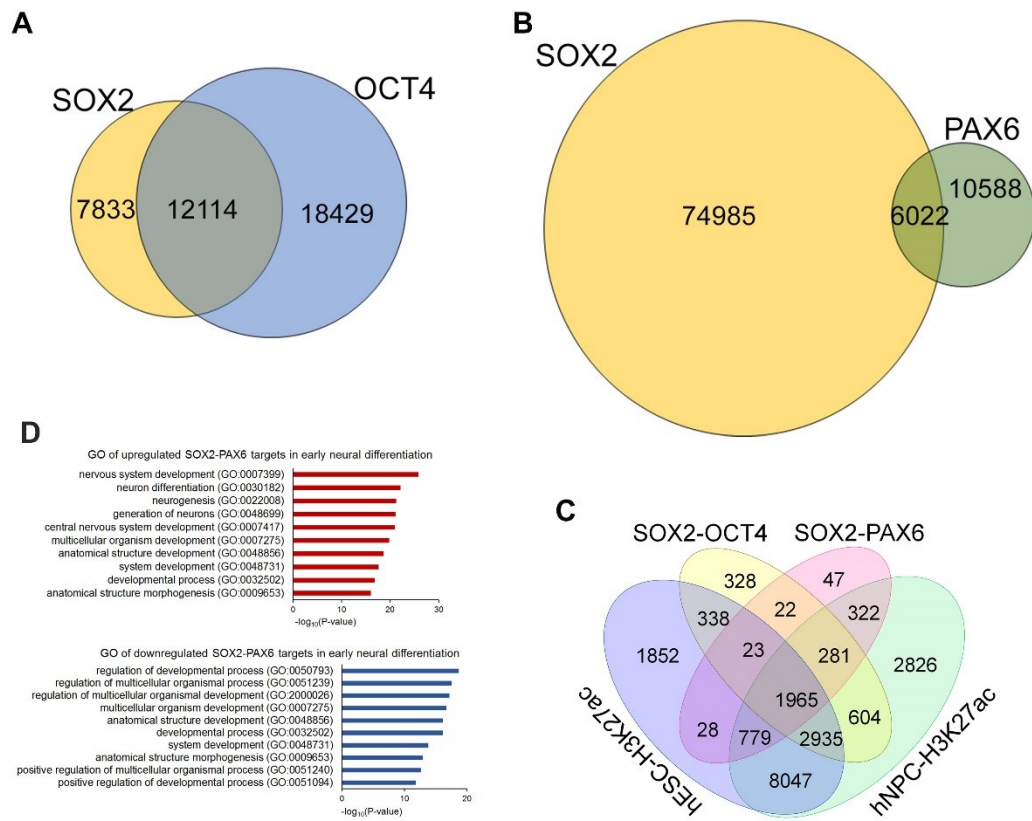

**Fig. S5. Analysis of SOX2-OCT4 and SOX2-PAX6 ChIP-seq datasets. Related to Fig. 5.** (A) Venn diagram of SOX2 and OCT4 ChIP-Seq peak overlapping in hESCs. (B) Venn diagram of SOX2 and PAX6 ChIP-Seq peak overlapping in hNPCs. (C) Venn diagram of analysis summary of SOX2-OCT4 and SOX2-PAX6 target genes in relation to H3K27ac in hESCs and hNPCs. (D) GO analysis of biological process of upregulated ( $\geq 1.5$  fold of hESC level) and downregulated ( $\leq 0.5$  fold of hESC level) SOX2-PAX6 target genes in the early neural differentiating cells.

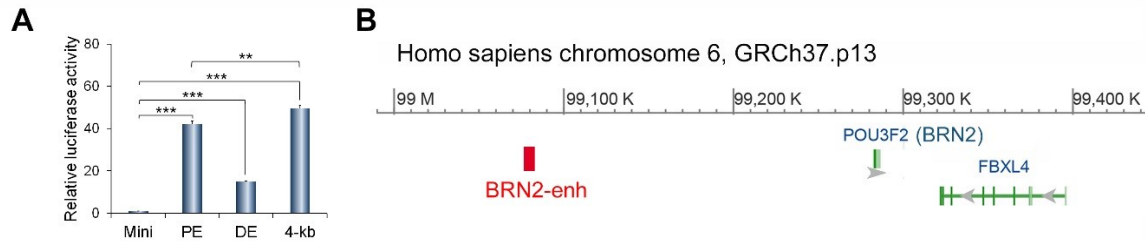

**Fig. S6. OCT4 and BRN2 enhancers. Related to Fig. 6.** (A) OCT4-luciferase activities in hESCs 48 hours after the transfection. Data are presented as mean  $\pm$  SD of three independent transfection experiments. \*\*\* and \*\* represent  $p < 0.0001$  and  $0.005$ , respectively, by student  $t$  test. Mini represents minimal promoter, PE and DE represent proximal and distal enhancers. (B) Schematic map of human BRN2 (*POU3F2*) locus. Identified enhancer region, which is bound by SOX2 and PAX6, is marked in red.

## Supplemental Tables

**Table S1: Primers used in the study, related to Figs. 1-3 and 6, Figs. S1, S3-S4.**

| For cloning                | Forward (5' - 3')                | Reverse (5' - 3')                |
|----------------------------|----------------------------------|----------------------------------|
| SOX2 cDNA<br>FseI/Ascl     | TATAGGCCGCGCCAGATCTTATGT         | AATTGGCGCGCCACTAGTTCACATGTGT     |
| Sox2-mutant-<br>R75E       | ATACCGGCCCCGAGCGGAAAACCA         | ATCCGGGTGCTCC                    |
| Sox2-mutant-<br>K57E, R60E | CTGGAAGAGCGCTGCACATGAAGG         | CCGTTTCAGCCTCGTCGATGAACGG        |
| OCT4 cDNA                  | TTAAACTAGTATGGCGGGACACCTG        | TATAGGATCCTTAGTTTGAATGCATGGGAGA  |
| PAX6 cDNA                  | ATATGGATCCTATTCGAGCCCCGTGGAATC   | GCGACTCGAGTGTAATCTTGCCAGTATTG    |
| BRN2 enhancer              | AATTGGTACCACTGCATAAATGGTCTAGTGGG | AATTGCTAGCTCGGAATGGATCACAGATTTTC |

| For ChIP-qPCR    | Forward (5' - 3')      | Reverse (5' - 3')      |
|------------------|------------------------|------------------------|
| Oct4-PE          | ACCAGGCCCCATAATCTACC   | TTCCCCCACTCTTATGTTGC   |
| Oct4-DE          | TGAGAAACACTGGTGTGGAGAT | TCTCAATCCCCAGGACAGAA   |
| GAPDH 2nd intron | AATGAATGGGCAGCCGTTAG   | AGCTAGCCTCGCTCCACCTGAC |

| For qPCR         | Forward (5' - 3')         | Reverse (5' - 3')        |
|------------------|---------------------------|--------------------------|
| β-ACTIN          | AGAGCTACGAGCTGCCTGAC      | AGCACTGTGTTGGCGTACAG     |
| ASCL1            | GGAGCTTCTCGACTTCACCA      | CTAAAGATGCAGGTTGTGCG     |
| Brachyury (TBXT) | TGCTTCCCTGAGACCCAGTT      | GATCACTTCTTTCTTTGCATCAAG |
| BRN2             | CCTCGTAAGGGGAATGTG        | ATCGGAGAGAGTTGAAGCCA     |
| CDX2             | GGATGGTGATGTAGCGACTGT     | ACCTGTGCGAGTGGATGC       |
| EOMES            | AGGAATTCTTGCTTTGCTAATTCTG | CGAAGAAACAGCAAGAGCAGC    |
| GATA6            | ACTTGAGCTCGCTGTTCTCG      | CAGCAAAAATACTTCCCCCA     |
| FOXA2            | GGGAGCGGTGAAGATGGA        | TCATGTTGCTCACGGAGGAGTA   |
| GFAP             | CACCACGATGTTCTCTTGA       | GTGCAGACCTTCTCCAACCT     |
| NESTIN           | GAGGGAAGCTTGGAGCCAC       | AAGATGTCCCTCAGCCTGG      |
| NANOG            | TGATTTGTGGCCTGAAGAAAA     | GAGGCATCTCAGCAGAAGACA    |
| OCT4             | TCGAGAACCGAGTGAGAGGC      | CACACTCGGACCACATCCTTC    |
| PAX6             | TCCGTTGGAAGTATGGAGT       | GTTGGTATCCGGGGACTTC      |
| RPL22            | TCGCTCACCTCCCTTTCTAA      | TCACGGTGATCTTGCTCTTG     |
| SOX1             | AACACTTGAAGCCCAGATGGA     | GCAGGCTGAATTCGGTTCTC     |
| SOX17            | ACGCCGAGCTCAGCAAGAT       | TCCACGTACGGCCTCTTCTG     |
| SOX2             | GCCGAGTGGAACCTTTTGTCG     | GCAGCGTGACTTATCCTTCTT    |
| SOX21            | CCACTCGCTTGGATTCTGACACA   | TCGACTCAAACCTAGGGCAACGA  |
| SOX3             | TGGAGAACTGCAACGCCTACGC    | GATCACGGCAGAAATCACCAACTC |

**Table S2: Antibodies used in the study, related to Figs 1-4, 6 and Figs S1-S2 and S4.**

| <b>Antibodies</b>            | <b>Company: Cat#</b>      | <b>Dilutions</b>               |
|------------------------------|---------------------------|--------------------------------|
| Brachyury                    | R&D: AF2085               | IB: 1:500                      |
| Sox17                        | R&D: MAB1924              | IB: 1:500                      |
| GATA6                        | Abcam: ab22600            | IB: 1:400                      |
| Flag                         | Sigma: F1804              | IB: 1:1000, IP: 1:100          |
| Tuj1 ( $\beta$ -tubulin III) | Sigma-T8660               | IF:1:1000                      |
| FoxA2                        | Abcam: ab60721            | IB: 1:200                      |
| Caspase 3                    | Cell Signalling: 9662     | IF:1:200                       |
| HA                           | Sigma: H3663              | IB:1:1000 IF :1:100            |
| Nestin                       | R&D: MAB1259              | IF: 1:100                      |
| Oct-04                       | Santa cruz: sc-5279       | IB 1:400 IF 1:100              |
| Pax6                         | Millipore: AB2237         | IB : 1:1000 IF : 1:200         |
| Pax6                         | Abcam: 109233             | IB: 1:1000                     |
| Phospho Histone H3 (Ser10)   | Millipore: 05-806         | IF 1:200                       |
| Sox2                         | R&D : AF2018              | IB: 1:400 IF: 1:40             |
| Tra-1-81                     | Santa Cruz: sc-21706      | IF: 1:50                       |
| $\beta$ -actin               | Sigma: A5316              | IB: 1:5000                     |
| $\alpha$ -tubulin            | Cell Signaling:10376      | IB: 1:200                      |
| MC-480 (SSEA-1)              | DSHB: MC480               | IF: 1:5                        |
| Goat IgG-HRP                 | Santa Cruz: 2020          | IB: 1:5000                     |
| Mouse IgG-HRP                | Santa Cruz: 2005          | IB: 1:5000                     |
| Mouse IgG-HRP light chain    | Stratech: 211-032-174     | IB: 1:10000                    |
| Normal mouse IgG2a           | Santa Cruz: 2025          | IP: $\mu$ g equivalent to HA   |
| Normal rabbit IgG            | Santa Cruz: 2027          | IP: $\mu$ g equivalent to SOX2 |
| Rabbit IgG-Alexa Fluor 488   | Life Technologies: A11055 | IF: 1:400                      |
| Rabbit IgG-Alexa Fluor 568   | Life Technologies A11011  | IF:1:400                       |
| Rabbit IgG-HRP               | Santa Cruz: 2004          | IB: 1:2000                     |
| Rabbit IgG-HRP light chain   | Stratech: 211-032-171     | IB: 1:10000                    |
| Mouse IgG-Alexa Fluor 488    | Life Technologies: A11001 | IF 1:400                       |
| Mouse IgG Alexa Fluor 568    | Life Technologies: A11004 | IF 1:400                       |
